# Supplementary material for: Glucose-oxidase like catalytic mechanism of noble metal nanozymes
Source: PubMed Central journal article supplement (PMC8184917; doi:10.1038/s41467-021-23737-1), 2021-06-07
Supplement: 41467_2021_23737_MOESM1_ESM.pdf [file 41467_2021_23737_MOESM1_ESM.pdf]

# Supplementary Information

## Glucose-oxidase like catalytic mechanism of noble metal nanozymes

Jinxing Chen,<sup>1,2</sup> Qian Ma,<sup>1,2</sup> Minghua Li,<sup>1</sup> Daiyong Chao,<sup>1</sup> Liang Huang,<sup>1,2</sup> Weiwei Wu,<sup>1,2</sup> Youxing Fang,<sup>\*1</sup> and Shaojun Dong,<sup>\*1,2</sup>

1 State Key Laboratory of Electroanalytical Chemistry, Changchun Institute of Applied Chemistry, Chinese Academy of Sciences, Changchun, Jilin 130022, PR China

2 University of Science and Technology of China, Hefei, Anhui 230026, PR China

Email: Youxing Fang, [fangyx@ciac.ac.cn](mailto:fangyx@ciac.ac.cn); Shaojun Dong, [dongsj@ciac.ac.cn](mailto:dongsj@ciac.ac.cn).

42

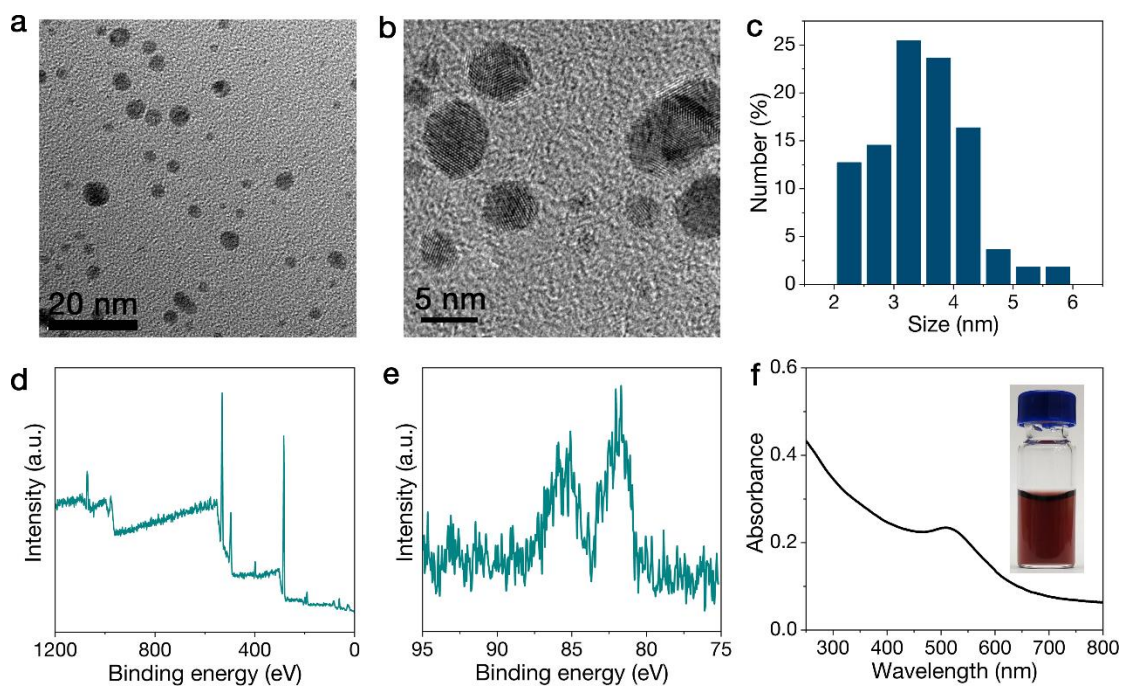

43

44 **Supplementary Fig. 1. Characterizations of Au nanoparticles. (a, b)**

45 TEM images of Au nanoparticles. (c) Size distribution of Au nanoparticles.

46 (d, e) XPS spectra of Au nanoparticles. (f) UV-Vis spectrum of Au

47 nanoparticles. The inset shows Au nanoparticles dispersed in water.

48

49

50

51

52

53

54

55

56

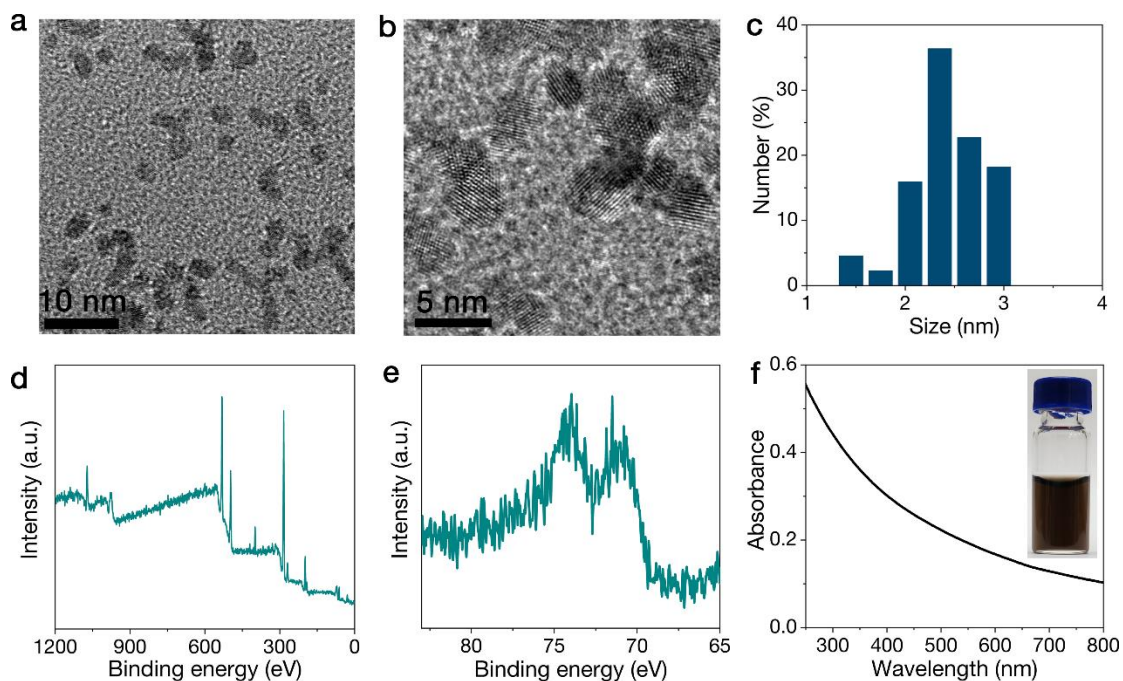

58

59 **Supplementary Fig. 2. Characterizations of Pt nanoparticles.** (a, b)

60 TEM images of Pt nanoparticles. (c) Size distribution of Pt nanoparticles.

61 (d, e) XPS spectra of Pt nanoparticles. (f) UV-Vis spectrum of Pt

62 nanoparticles. The inset shows Pt nanoparticles dispersed in water.

63

64

65

66

67

68

69

70

71

72

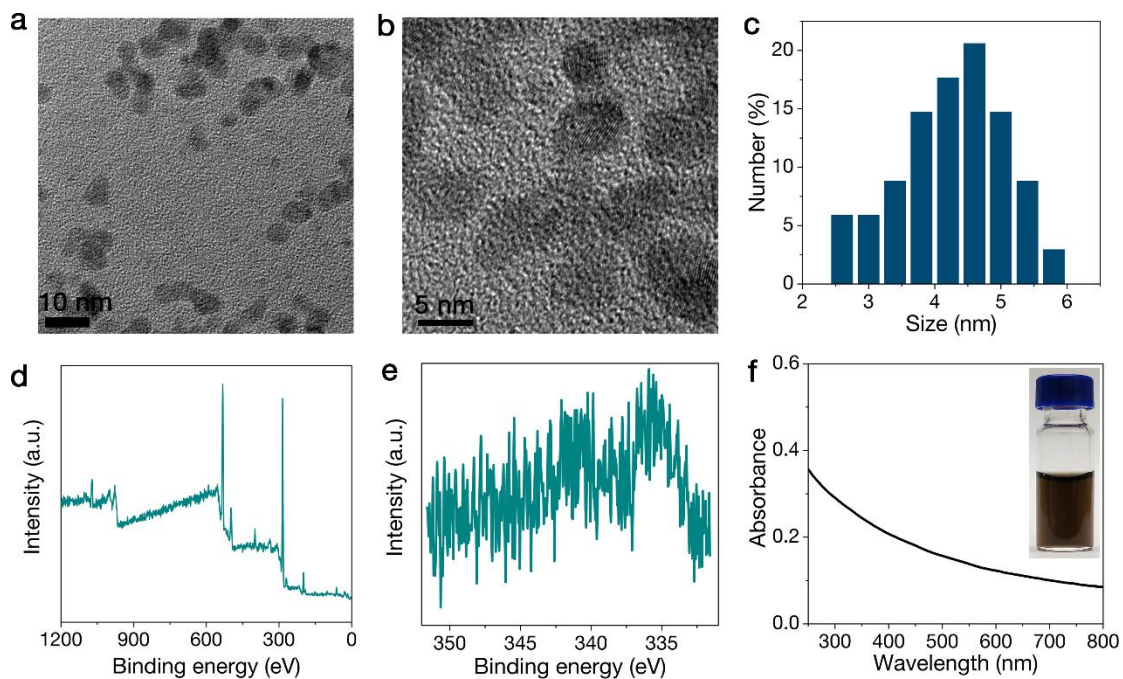

73

74 **Supplementary Fig. 3. Characterizations of Pd nanoparticles. (a, b)**

75 TEM images of Pd nanoparticles. (c) Size distribution of Pd nanoparticles.

76 (d, e) XPS spectra of Pd nanoparticles. (f) UV-Vis spectrum of Pd

77 nanoparticles. The inset shows Pd nanoparticles dispersed in water.

78

79

80

81

82

83

84

85

86

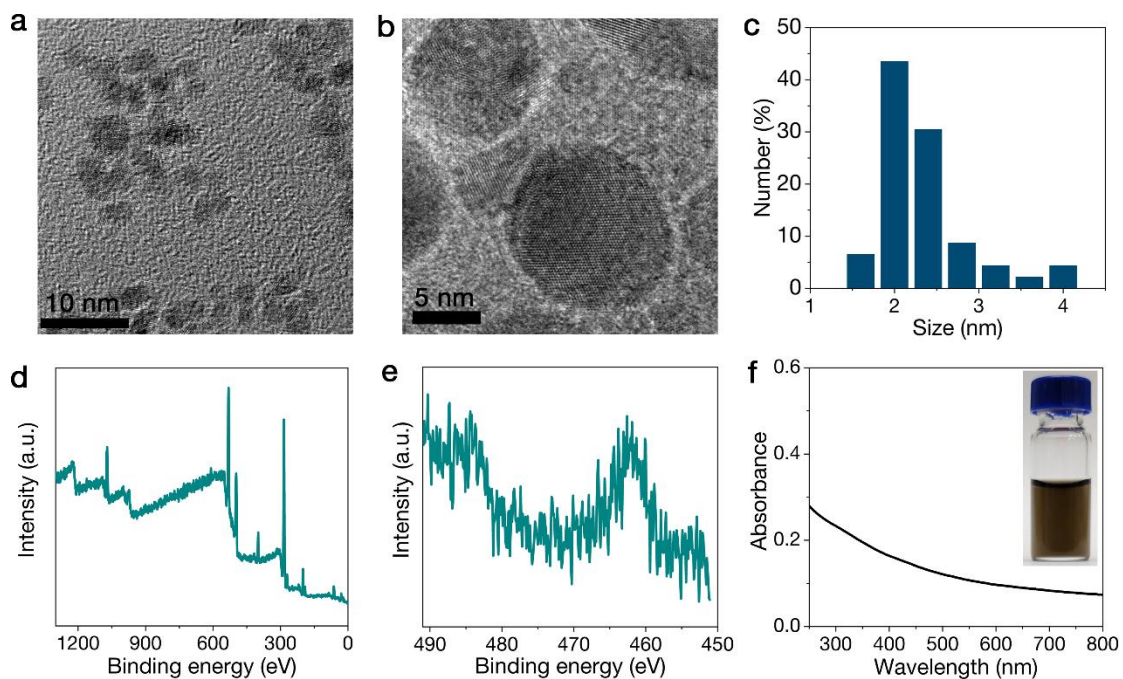

88

89 **Supplementary Fig. 4. Characterizations of Ru nanoparticles. (a, b)**

90 TEM images of Ru nanoparticles. (c) Size distribution of Ru nanoparticles.

91 (d, e) XPS spectra of Ru nanoparticles. (f) UV-Vis spectrum of Ru

92 nanoparticles. The inset shows Ru nanoparticles dispersed in water.

93

94

95

96

97

98

99

100

101

102

103

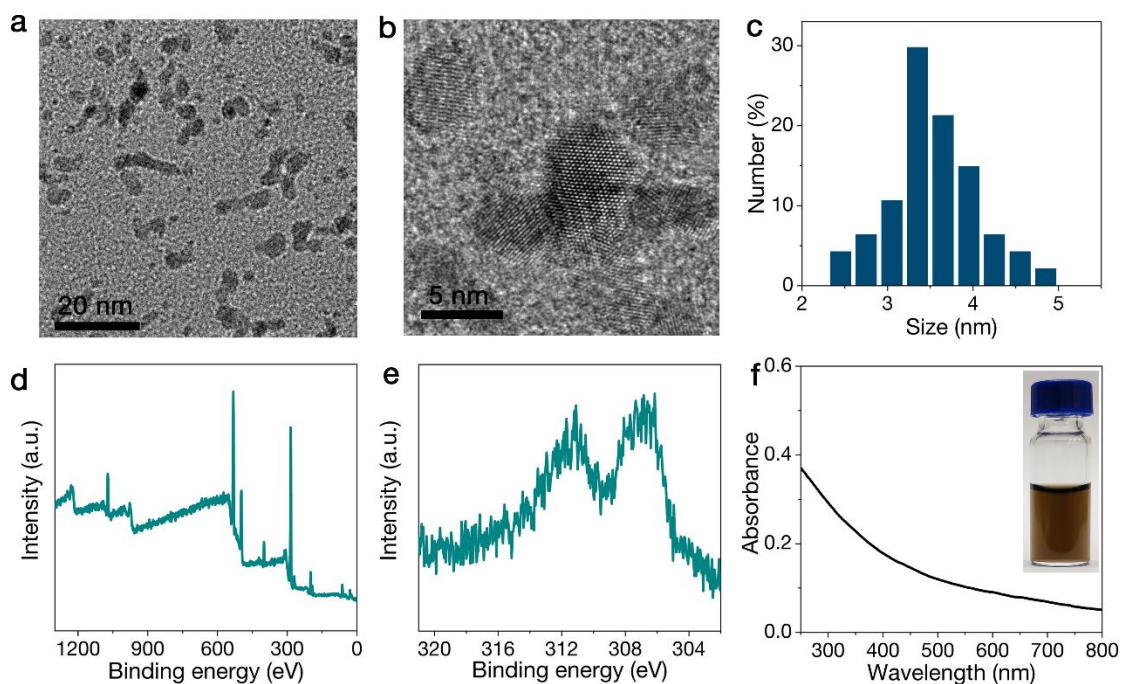

104

105 **Supplementary Fig. 5. Characterizations of Rh nanoparticles.** (a, b)

106 TEM images of Rh nanoparticles. (c) Size distribution of Rh nanoparticles.

107 (d, e) XPS spectra of Rh nanoparticles. (f) UV-Vis spectrum of Rh

108 nanoparticles. The inset shows Rh nanoparticles dispersed in water.

109

110

111

112

113

114

115

116

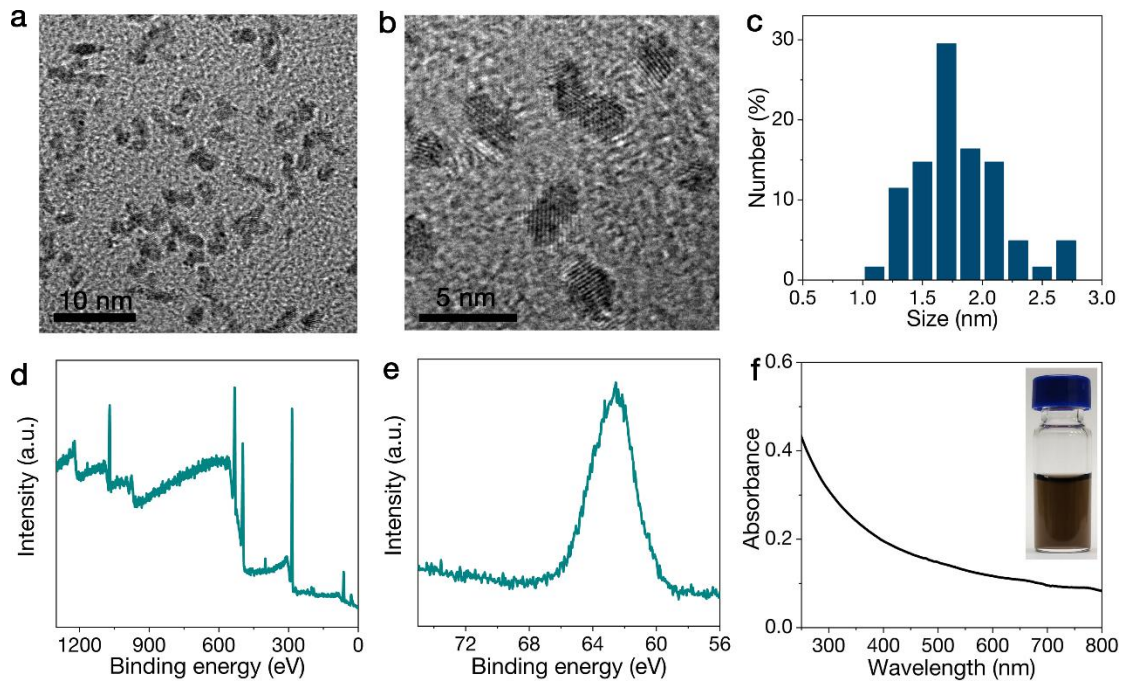

118

119 **Supplementary Fig. 6. Characterizations of Ir nanoparticles. (a, b)**

120 TEM images of Ir nanoparticles. (c) Size distribution of Ir nanoparticles.

121 (d, e) XPS spectra of Ir nanoparticles. (f) UV-Vis spectrum of Ir

122 nanoparticles. The inset shows Ir nanoparticles dispersed in water.

123

124

125

126

127

128

129

130

131

132

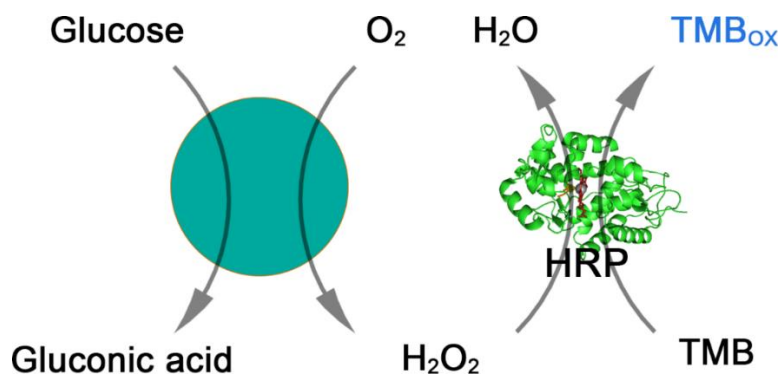

133

134 **Supplementary Fig. 7.** Schematic representation of the detection of  $H_2O_2$   
135 produced during oxidation of glucose catalyzed by Au NPs.

136

137

138

139

140

141

142

143

144

145

146

147

148

149

150



151

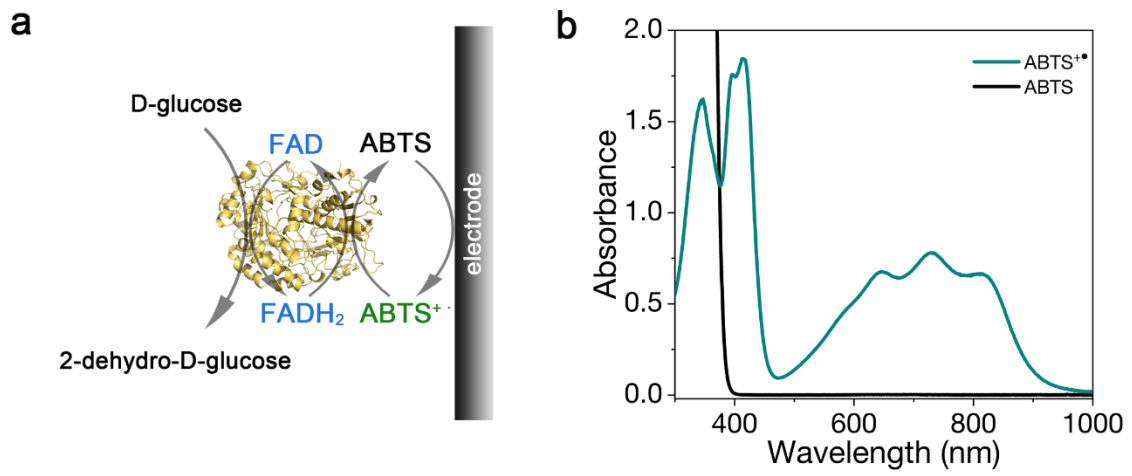

152

153 **Supplementary Fig. 8.** (a) Schematic diagram of ABTS as a mediator of  
154 glucose oxidase. (b) UV-vis spectra of ABTS and ABTS<sup>•+</sup>.

155

156

157

158

159

160

161

162

163

164

165

166

167

168

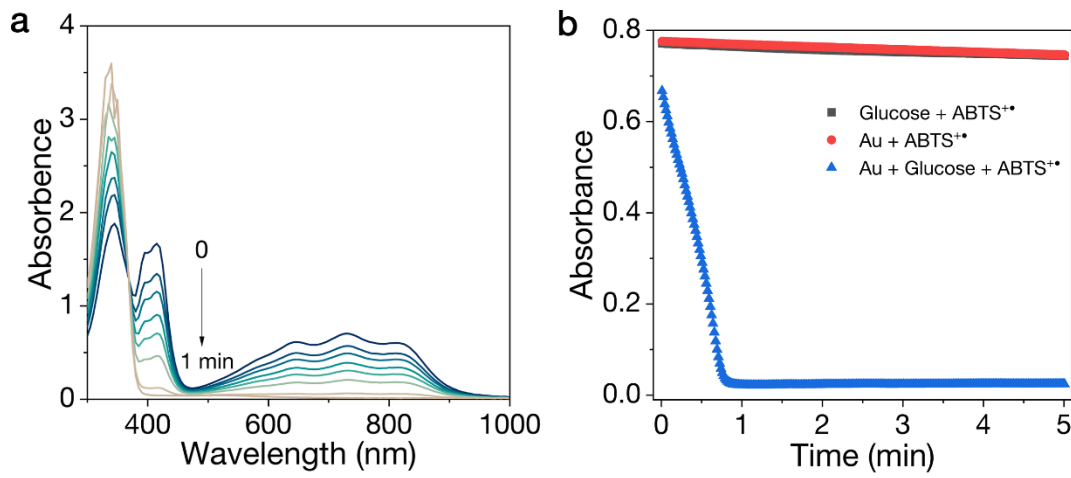

169

170 **Supplementary Fig. 9. Catalytic reduction of ABTS<sup>+</sup>• by Au NPs. (a)**

171 UV-vis spectra of ABTS<sup>+</sup>• over time in the presence of Au and glucose. (b)

172 The absorption changes of ABTS<sup>+</sup>• at 734 nm.

173

174

175

176

177

178

179

180

181

182

183

184

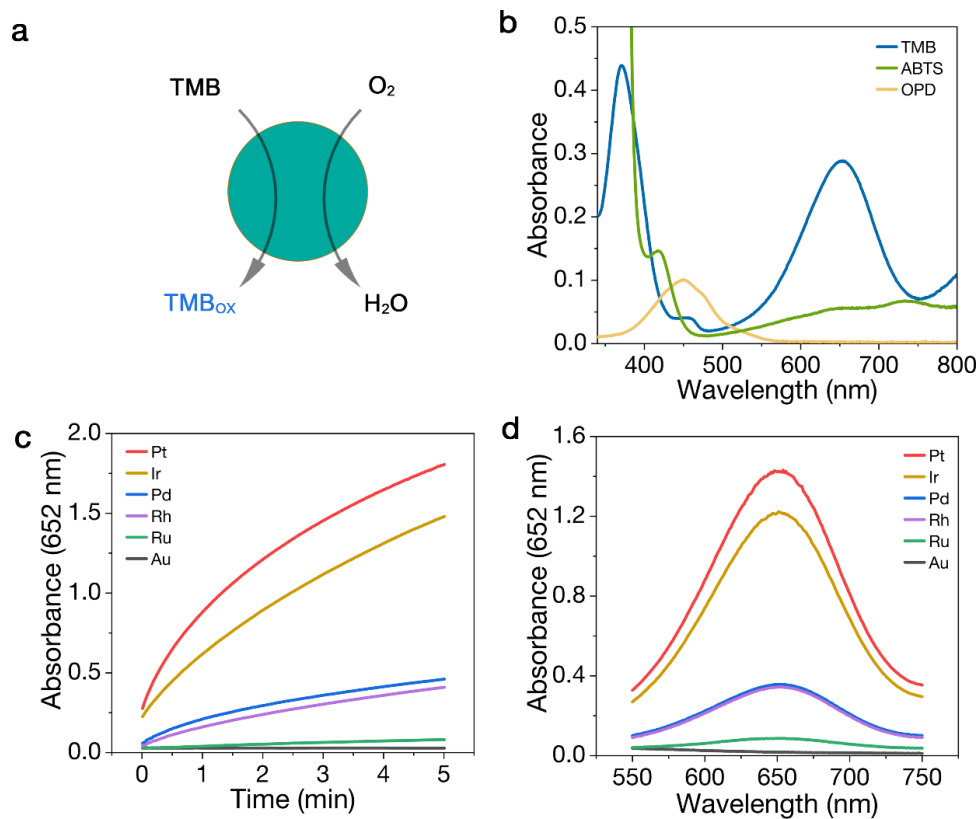

186

187 **Supplementary Fig. 10. Oxidase like activities of noble metal**  
 188 **nanozymes.** (a) Schematic representation of the oxidase like activity. (b)  
 189 UV-vis spectra of TMB, OPD, and ABTS after oxidation. (c) Time  
 190 dependent absorption changes of TMB at 652 nm in the presence of  
 191 different catalysts. (d) UV-vis spectra of TMB in the presence of different  
 192 catalysts.

193

194

195

196

197

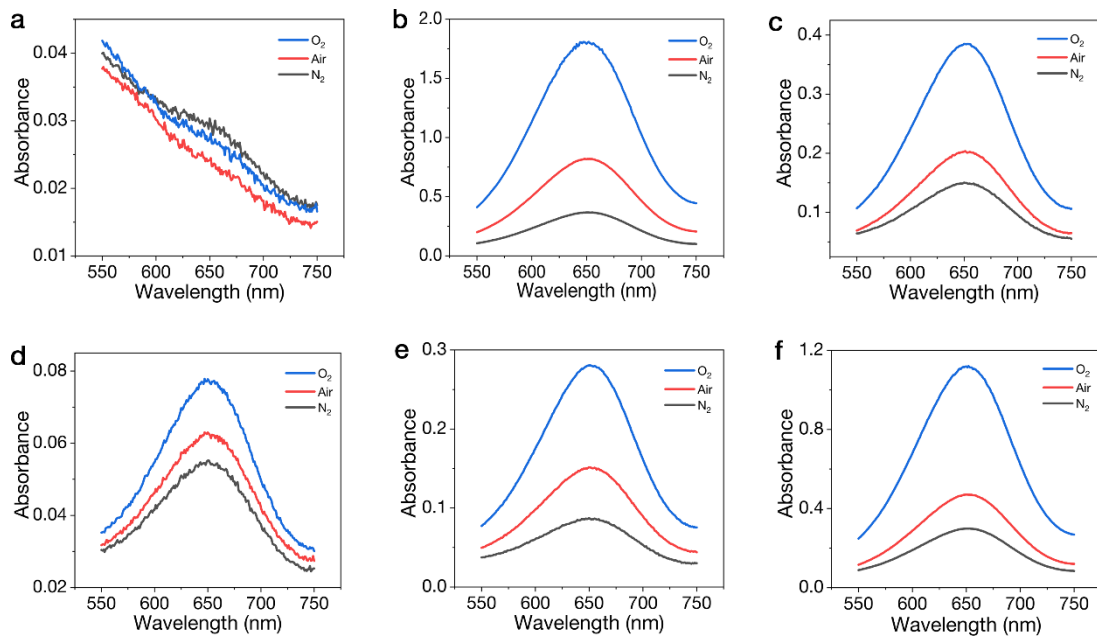

199

200 **Supplementary Fig. 11. Oxidase like activities of noble metal**  
201 **nanozymes.**UV-vis spectra of TMB in the presence of (a) Au, (b) Pt, (c)  
202 Pd, (d) Ru, (e) Rh, and (f) Ir in different gas saturated solutions.

203

204

205

206

207

208

209

210

211

212

213

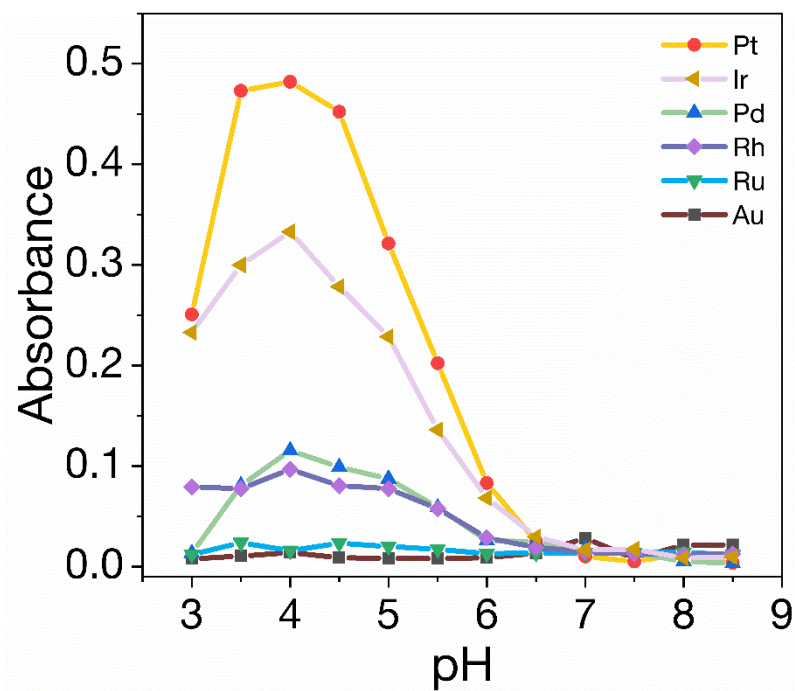

214

215 **Supplementary Fig. 12.** The pH dependent oxidase-mimic activities of  
216 different catalysts.

217

218

219

220

221

222

223

224

225

226

227

228

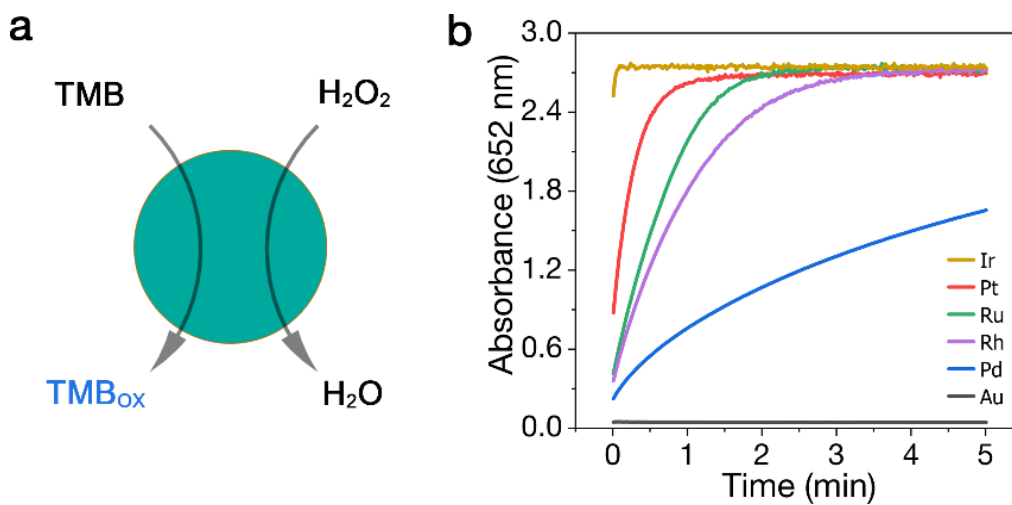

229

230 **Supplementary Fig. 13. Peroxidase like activities of noble metal**

231 **nanozymes.** (a) Schematic representation of the peroxidase like activity.

232 (b) Time dependent absorption changes of TMB at 652 nm in the presence

233 of H<sub>2</sub>O<sub>2</sub> and different catalysts.

234

235

236

237

238

239

240

241

242

243

244

245

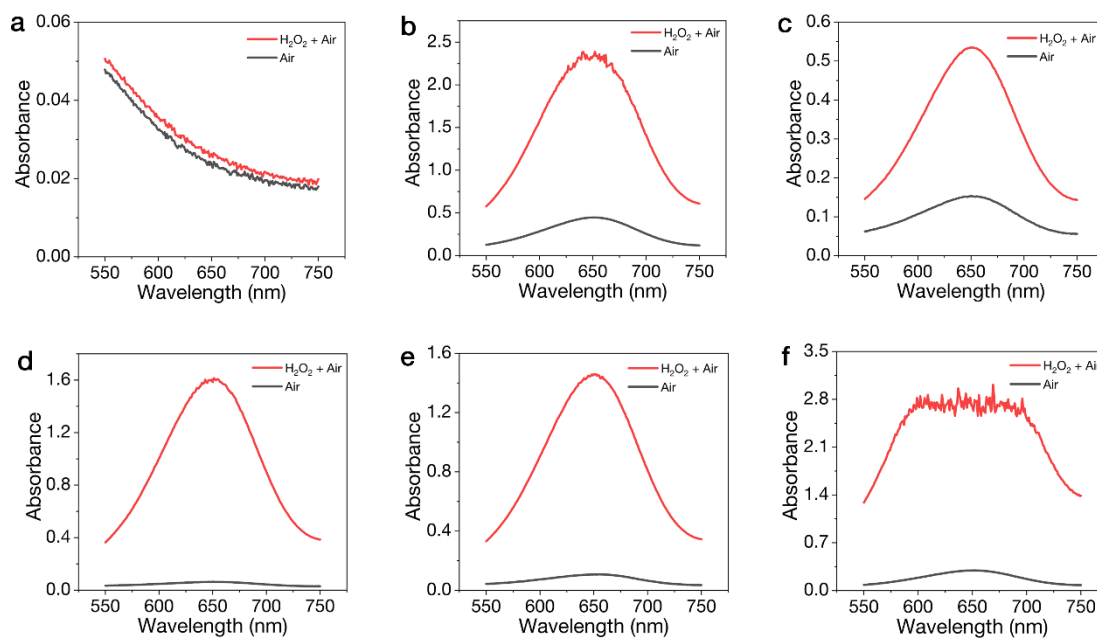

246

247 **Supplementary Fig. 14. Peroxidase like activities of noble metal**

248 **nanozymes. UV-vis spectra of TMB in the presence of (a) Au, (b) Pt, (c)**

249 **Pd, (d) Ru, (e) Rh, (f) Ir under different conditions.**

250

251

252

253

254

255

256

257

258

259

260

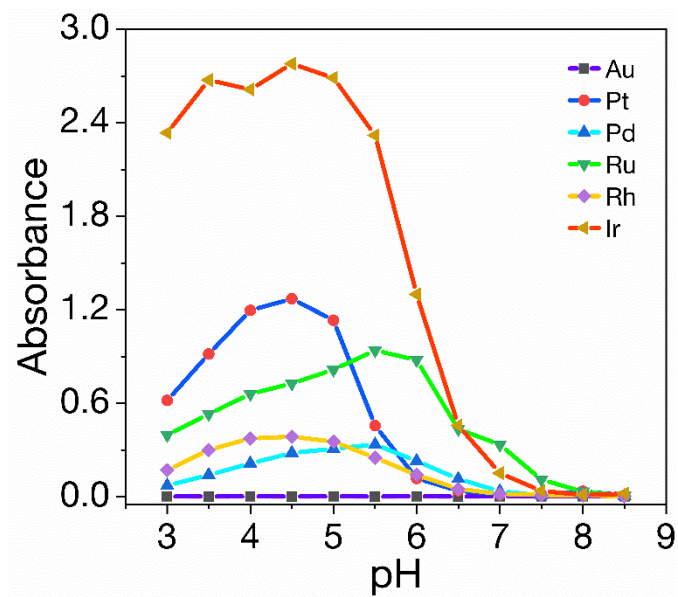

261

262 **Supplementary Fig. 15.** The pH dependent peroxidase-mimic activities  
263 of different catalysts.

264

265

266

267

268

269

270

271

272

273

274

275



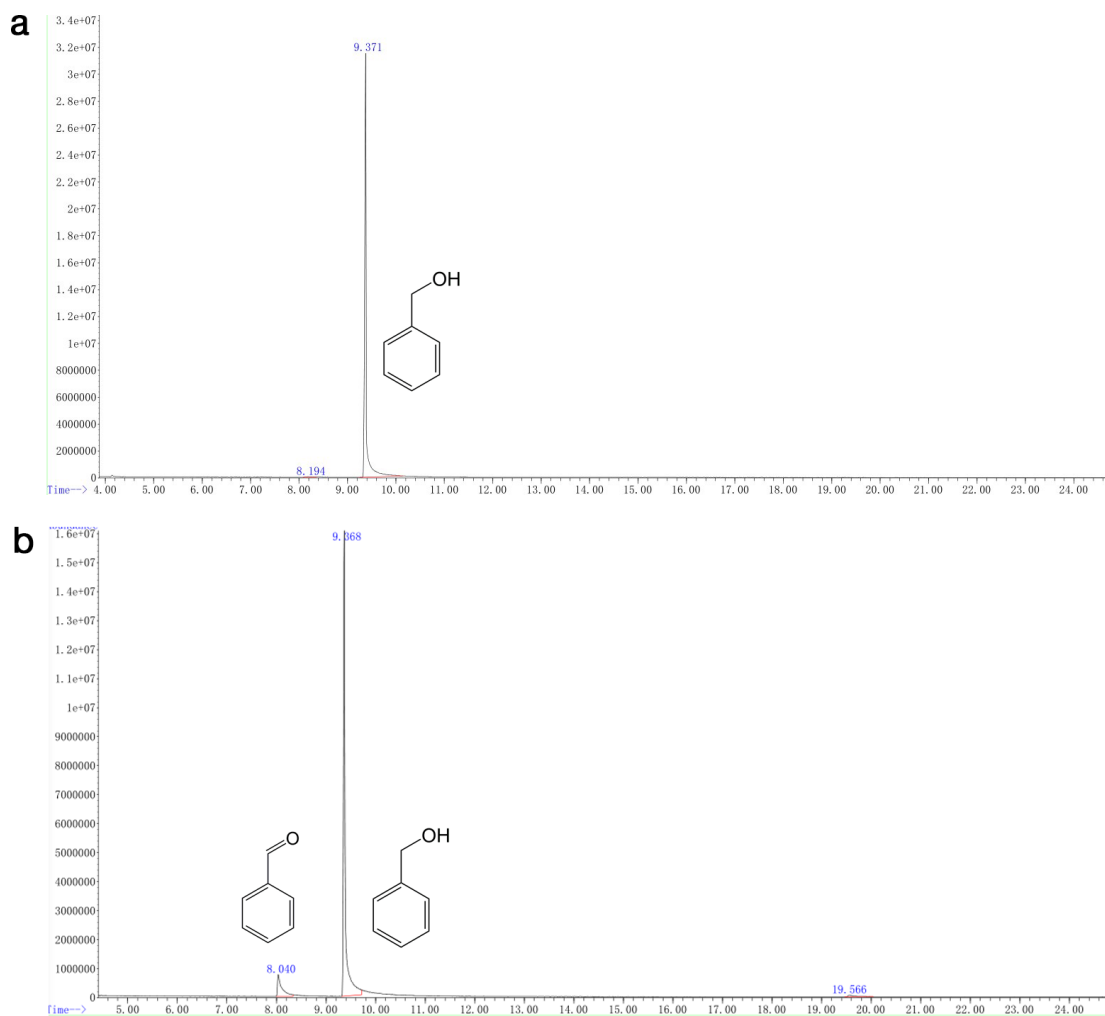

277

278 **Supplementary Fig. 16.** Chromatogram of benzyl alcohol before (a) and  
279 after (b) Au catalyzed oxidation reaction.

280

281

282

283

284

285

286

287

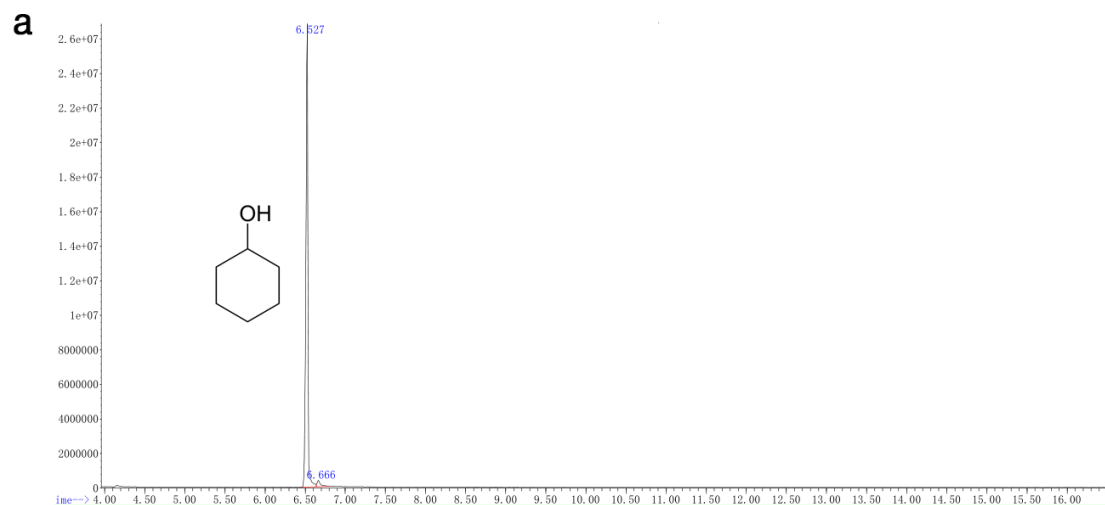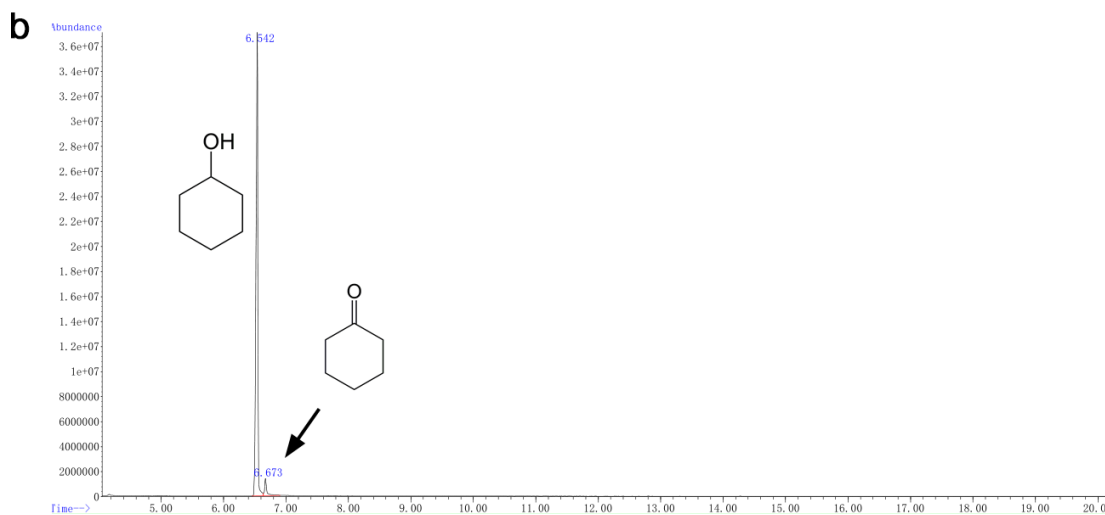

288

289 **Supplementary Fig. 17.** Chromatogram of cyclohexanol before (a) and  
290 after (b) Au catalyzed oxidation reaction.

291

292

293

294

295

296

297

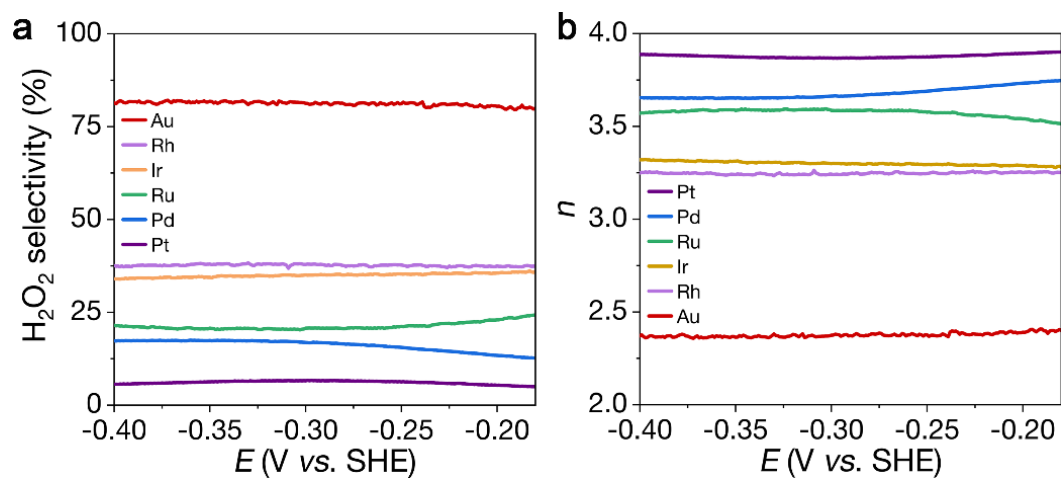

299

300 **Supplementary Fig. 18. ORR performance.** (a)  $O_2$  reduction selectivity  
301 toward  $H_2O_2$  production and the calculated values of electron transfer  
302 number.

303

304

305

306

307

308

309

310

311

312

313

314

315

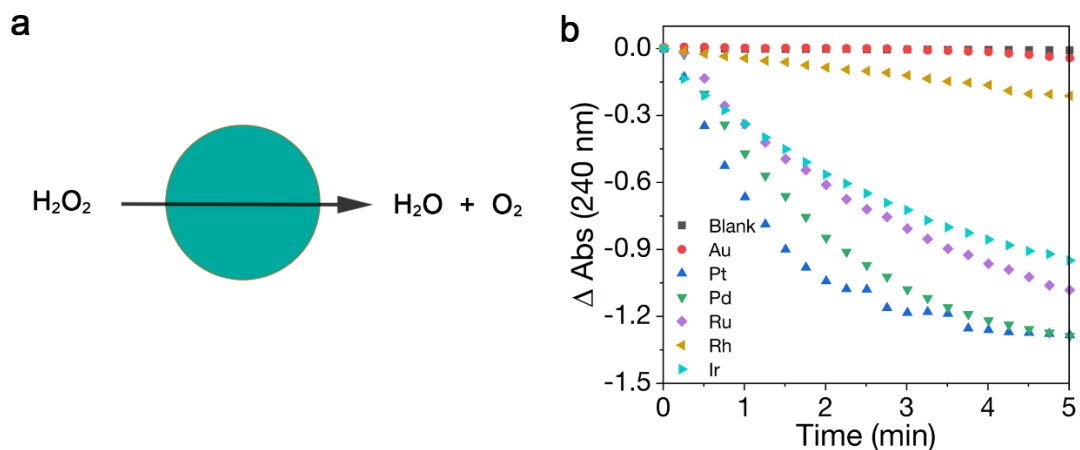

316

317 **Supplementary Fig. 19. Catalase like activities of noble metal**

318 **nanozymes.** (a) Schematic representation of the catalase like activity. (b)

319 Time dependent absorption changes of  $\text{H}_2\text{O}_2$  at 240 nm in the presence of

320 different catalysts.

321

322

323

324

325

326

327

328

329

330

331

332

333

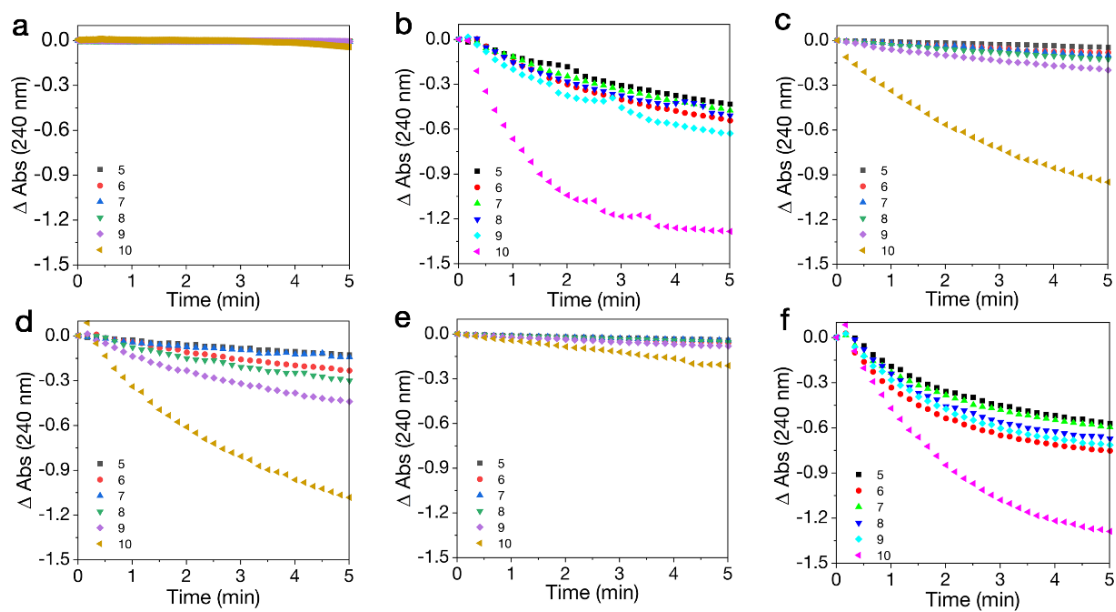

334

335 **Supplementary Fig. 20. Catalase like activities of noble metal**

336 **nanozymes.** Time dependent absorption changes of  $H_2O_2$  at 240 nm in the

337 presence of (a) Au, (b) Pt, (c) Pd, (d) Ru, (e) Rh, (f) Ir in buffer solutions

338 at different pH values.

339

340

341

342

343

344

345

346

347

348

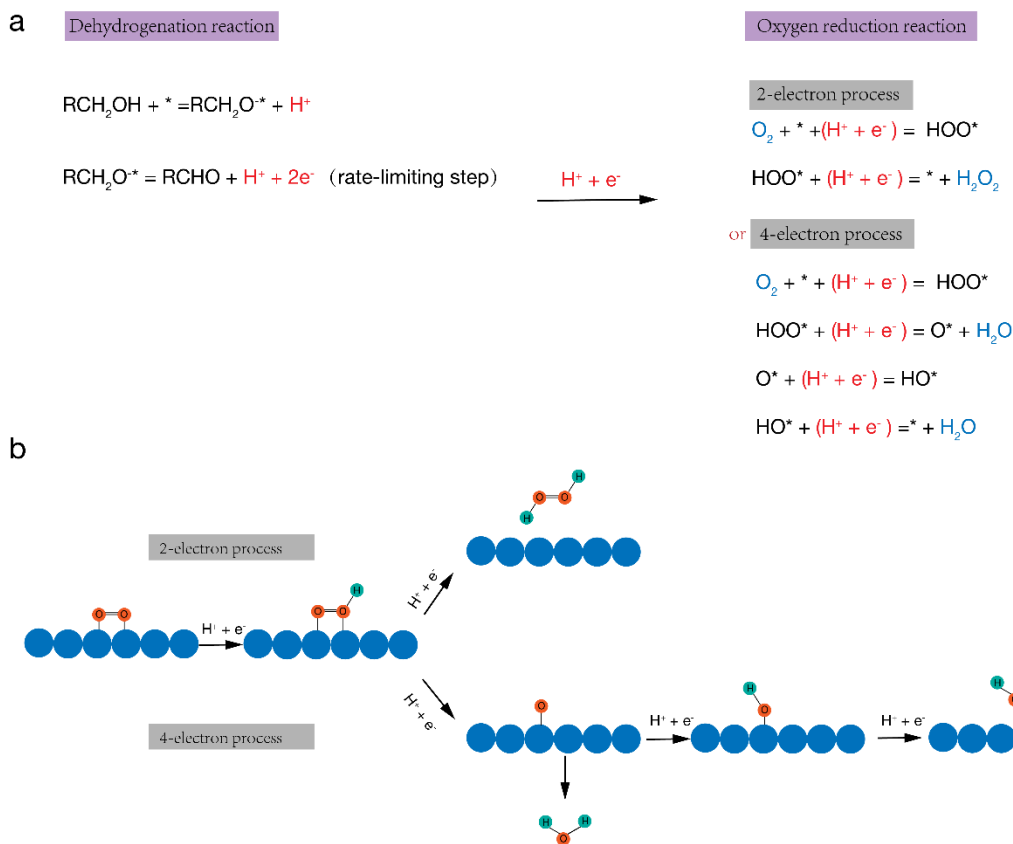

350

351 **Supplementary Fig. 21. Proposed mechanism of glucose oxidation**352 **catalyzed by noble metal NPs. (a) Mechanism of glucose oxidation**353 **catalyzed by noble metal NPs. (b) The difference between 2e- path and 4e-**354 **path in oxygen reduction reaction. \* denote the active sites at the surface**355 **of NPs**

356

357

358

359

360

361

362

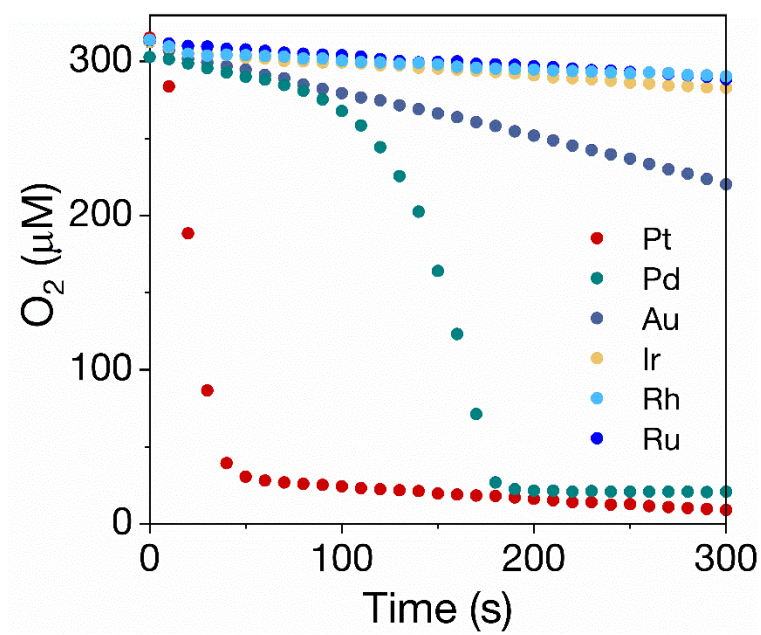

363

364 **Supplementary Fig. 22. Oxygen-consumption assays.** O<sub>2</sub> concentrations  
365 over time in the presence of HCOOK and different catalysts.

366

367

368

369

370

371

372

373

374

375

376

377

378

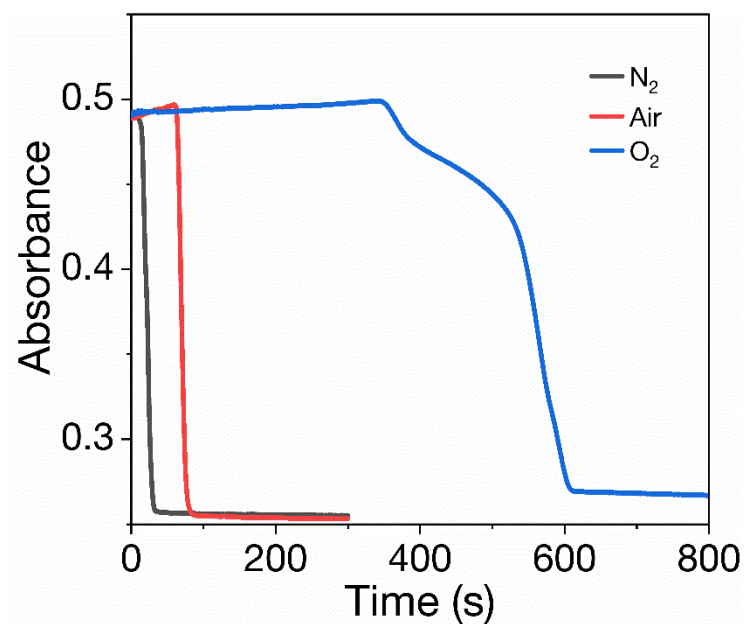

379

380 **Supplementary Fig. 23. FMN reduction.** UV-visible absorption at 450  
381 nm of the mixed solutions containing FMN, HCOOK, and Pt in N<sub>2</sub>, Air,  
382 and O<sub>2</sub>-saturated buffer.

383

384

385

386

387

388

389

390

391

392

393



394

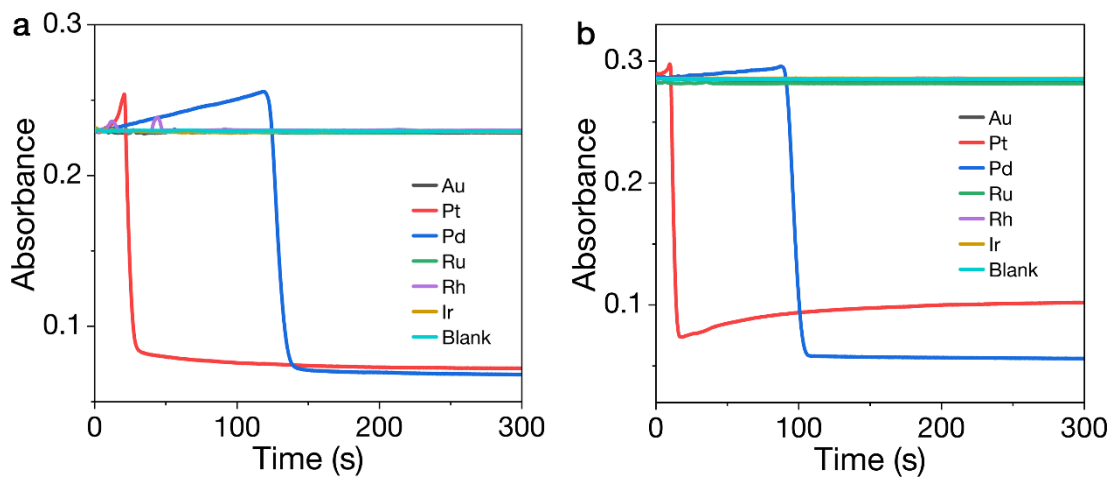

395

396 **Supplementary Fig. 24. FAD reduction.** (a) UV-visible absorption of  
397 FAD at 450 nm in the presence of HCOOK and different catalysts. (b) UV-  
398 visible absorptions of FMN at 450 nm in the presence of HCOOK and  
399 different catalysts.

400

401

402

403

404

405

406

407

408

409

410

411

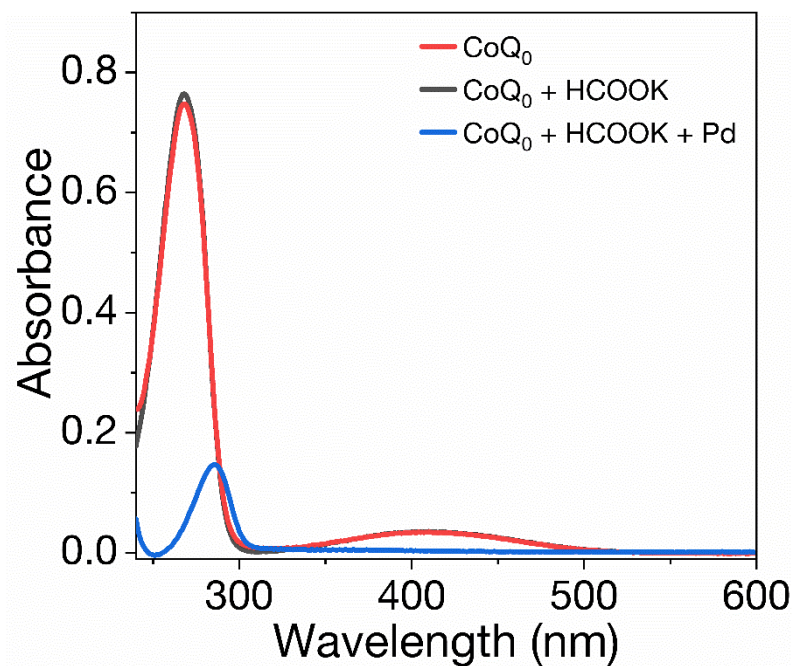

412

413 **Supplementary Fig. 25. CoQ<sub>0</sub> reduction.** UV-visible absorption spectra

414 of CoQ<sub>0</sub>, CoQ<sub>0</sub> + HCOOK, and CoQ<sub>0</sub> + HCOOK + Pd after reacting for 5

415 min.

416

417

418

419

420

421

422

423

424

425

426

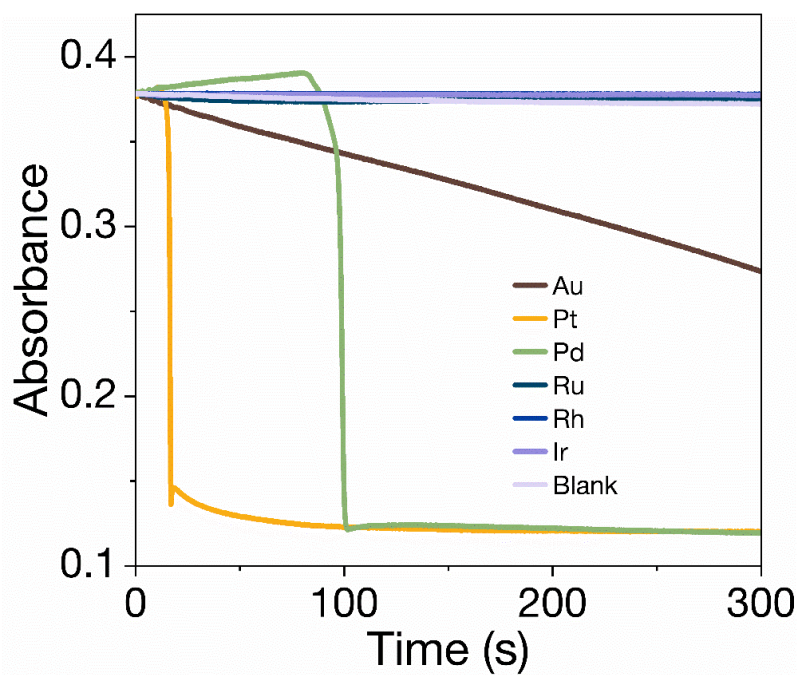

427

428 **Supplementary Fig. 26. CoQ<sub>0</sub> reduction.** UV-visible absorptions of

429 CoQ<sub>0</sub> at 268 nm in the presence of HCOOK and different catalysts.

430

431

432

433

434

435

436

437

438

439

440

441

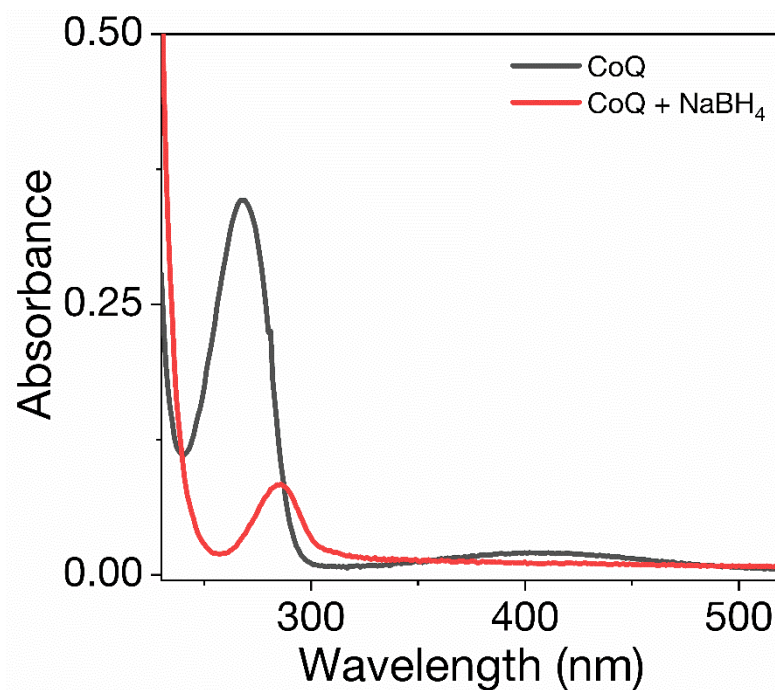

442

443 **Supplementary Fig. 27. CoQ<sub>0</sub> reduction.** UV-visible absorption spectra  
444 of CoQ<sub>0</sub>, CoQ<sub>0</sub> + NaBH<sub>4</sub>. Since NaBH<sub>4</sub> can reduce CoQ<sub>0</sub> rapidly, we have  
445 not measured the catalytic effect of nanoparticles on this reaction.

446

447

448

449

450

451

452

453

454

455

456

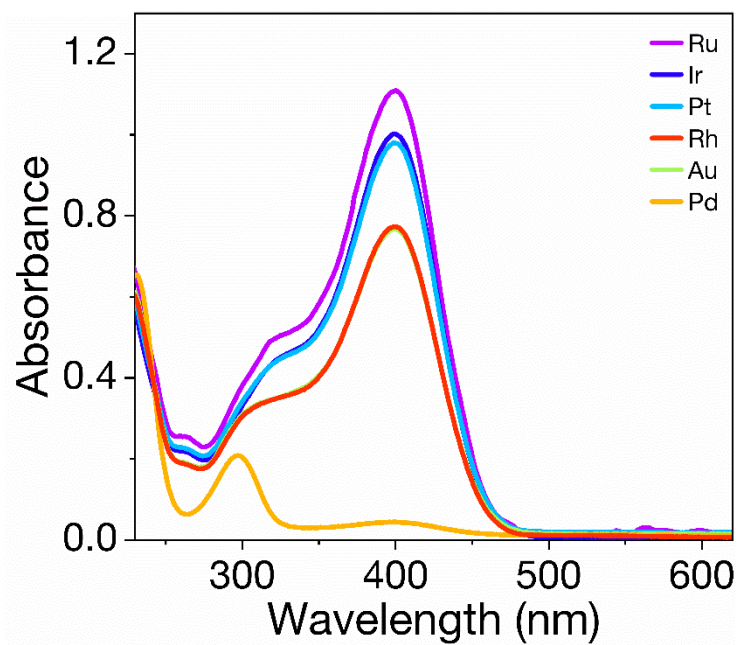

457

458 **Supplementary Fig. 28. pNP reduction.**UV-visible absorption spectra of  
459 pNP in the presence of NaBH<sub>4</sub> and different catalysts.
